# Supplementary material
Source: MDPI journal article supplement (https://www.mdpi.com/2073-4344/13/2/247)
Supplement: s1 [file s1]

**Table S1.** Orthogonal experimental factors and level assignments.

| <b>Factor</b> | <b>A/Glucose concentration (%)</b> | <b>B/Peanut melt concentration (%)</b> | <b>C/Media Starting pH</b> | <b>D/ Inoculation Volume Ratio (%)</b> |
|---------------|------------------------------------|----------------------------------------|----------------------------|----------------------------------------|
| <b>Level</b>  |                                    |                                        |                            |                                        |
| 1             | 4.0                                | 1.5                                    | 6.5                        | 10                                     |
| 2             | 5.5                                | 2.5                                    | 7.0                        | 12                                     |
| 3             | 7.0                                | 3.5                                    | 7.5                        | 14                                     |

**Table S2.** Orthogonal experimental results and analysis.

| <b>Factors</b>        |          |          |          |          | <b>Chemical potency(U/mL)</b> |
|-----------------------|----------|----------|----------|----------|-------------------------------|
| <b>Experiment No.</b> | <b>A</b> | <b>B</b> | <b>C</b> | <b>D</b> |                               |
| 1                     | 1        | 1        | 1        | 1        | 268                           |
| 2                     | 1        | 2        | 2        | 2        | 7794                          |
| 3                     | 1        | 3        | 3        | 3        | 7420                          |
| 4                     | 2        | 1        | 2        | 3        | 11943                         |
| 5                     | 2        | 2        | 3        | 1        | 8039                          |
| 6                     | 2        | 3        | 1        | 2        | 8696                          |
| 7                     | 3        | 1        | 3        | 2        | 9675                          |
| 8                     | 3        | 2        | 1        | 3        | 9044                          |
| 9                     | 3        | 3        | 2        | 1        | 4907                          |
| K <sub>1</sub>        | 15667    | 22072    | 18193    | 13399    | —                             |
| K <sub>2</sub>        | 28863    | 25061    | 24829    | 26350    | —                             |
| K <sub>3</sub>        | 23811    | 21208    | 25319    | 28592    | —                             |
| k <sub>1</sub>        | 5164     | 7291     | 6002     | 4404     | —                             |
| k <sub>2</sub>        | 9559     | 8296     | 8219     | 8721     | —                             |

|                   |                |                |                |                |   |
|-------------------|----------------|----------------|----------------|----------------|---|
| k <sub>3</sub>    | 7871           | 7007           | 8373           | 9469           | — |
| R(Range analysis) | 4395           | 1289           | 2371           | 5065           | — |
| Best combination  | A <sub>2</sub> | B <sub>2</sub> | C <sub>3</sub> | D <sub>3</sub> | — |

After the design and execution of the experiments, it could be seen that the strength of impact of the various factors on chemical potency was in the order D>A>C>B, i.e., the most significant influence was that of the inoculation volume ratio, as shown in Table S2. When the range analysis was performed, it was found that the best combination was A<sub>2</sub>B<sub>2</sub>C<sub>3</sub>D<sub>3</sub>, so a glucose concentration of 5.5%, peanut melt concentration of 2.5%, initial pH of 7.5 and inoculation volume ratio of 14% were the optimal condition.
